# Supplementary material for: Increased Antibiotic Resistance of Methicillin-Resistant Staphylococcus aureus USA300 Δpsm Mutants and a Complementation Study of Δpsm Mutants Using Synthetic Phenol-Soluble Modulins
Source: PubMed Central journal article supplement (PMC9705694; doi:10.4014/jmb.2007.07034), 2020-10-08

Supplemental Fig. 1. Determination of oxacillin MIC level in  $\Delta psm$  mutants.

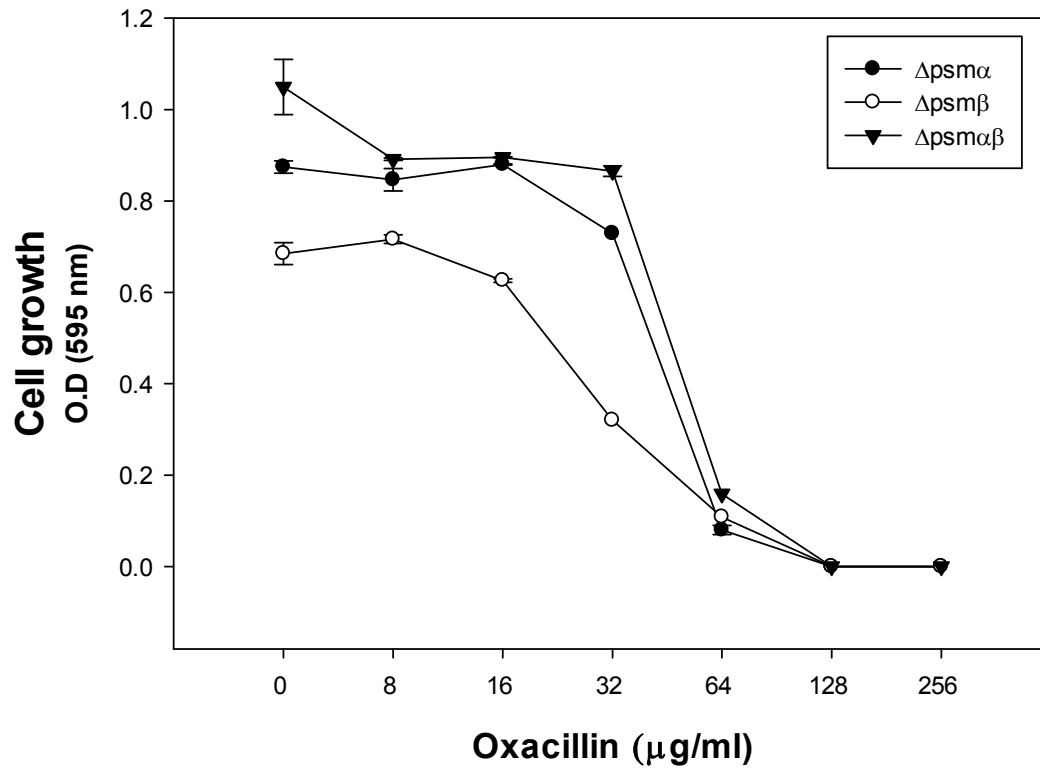

Supplement: jmb-31-1-115-supple.pdf [file jmb-31-1-115-supple.pdf]
